# Supplementary figures and images for: Excess Body Mass—A Factor Leading to the Deterioration of COVID-19 and Its Complications—A Narrative Review
Source: MDPI journal article supplement (doi:10.3390/v13122427), 2021-12-03

**Supplementary Figure S1.** Flow diagram of the review.

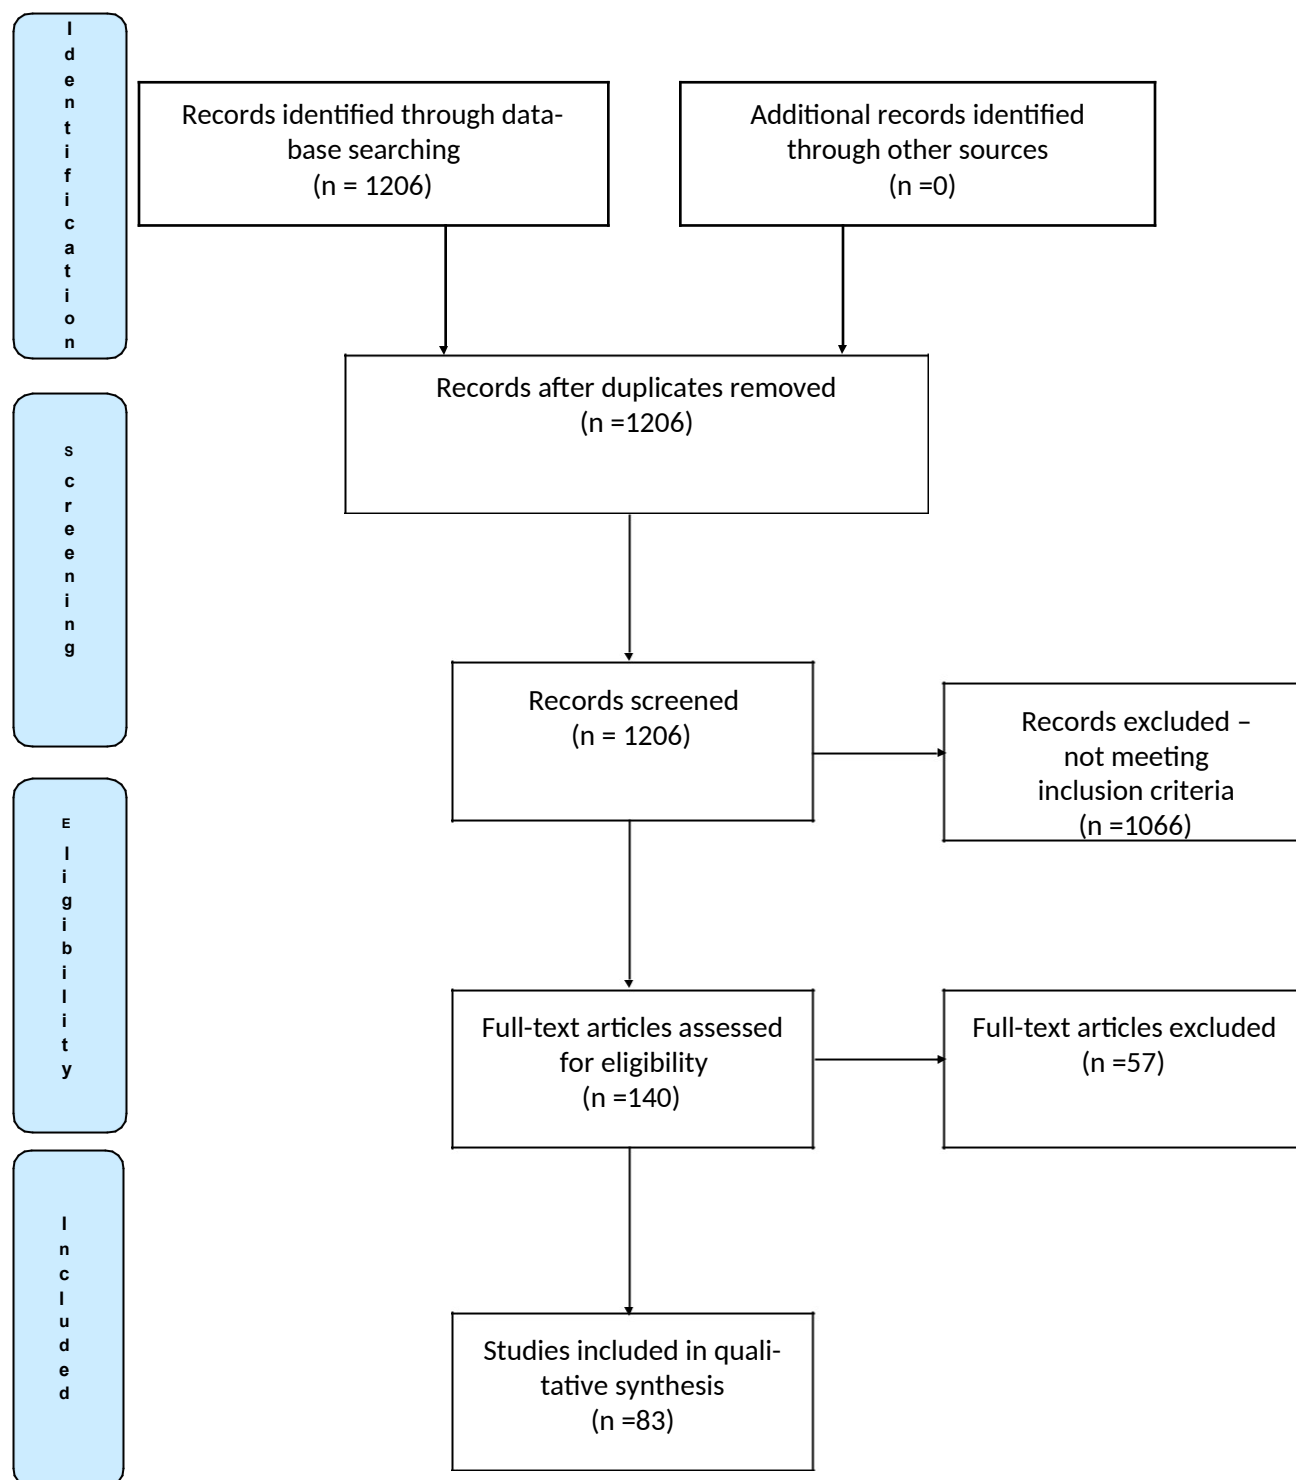

Supplement: s1 [file s1]
